# Supplementary material
Source: PubMed Central journal article supplement (PMC2682267)

Day 1

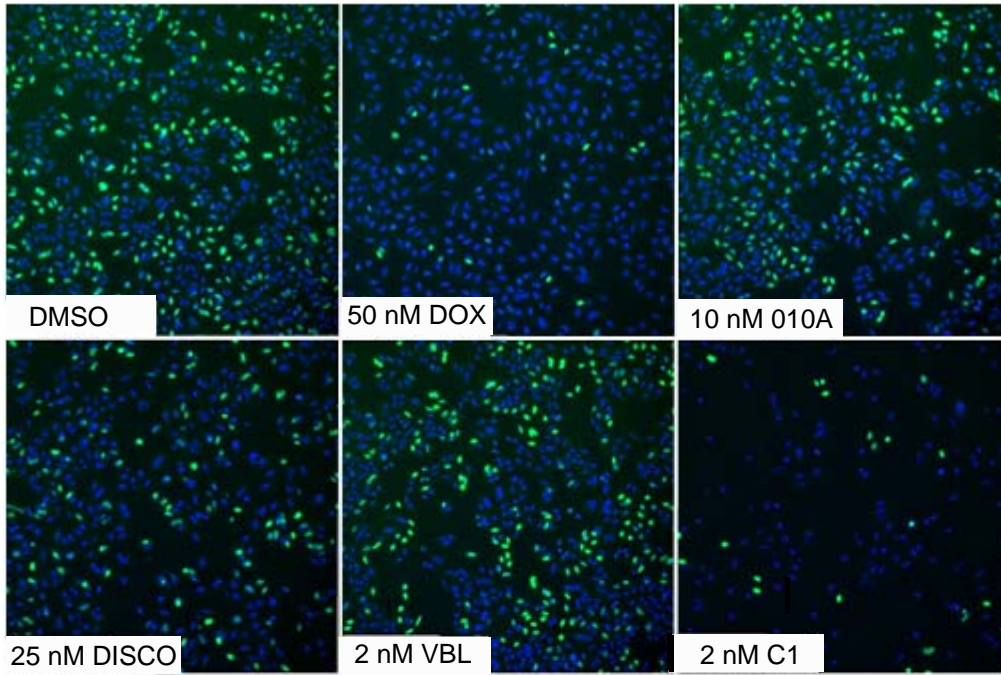

Day 7

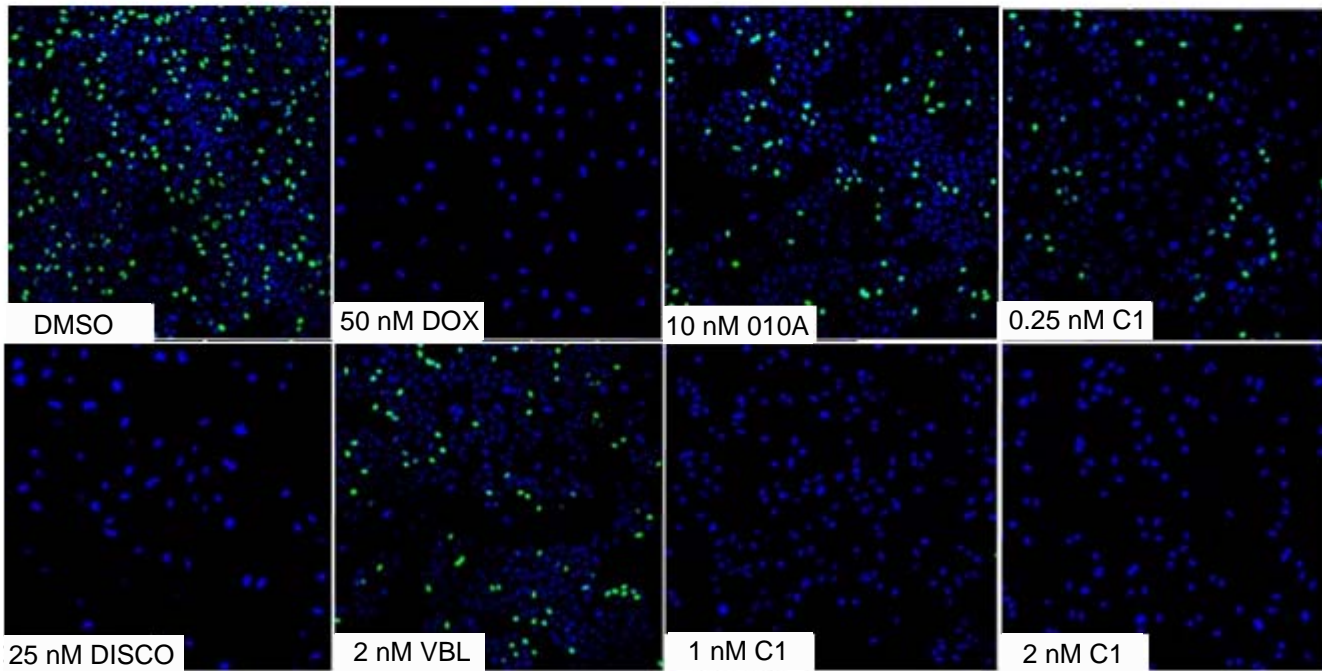

Supplement: 108.147330_1.pdf [file 108.147330_1.pdf]

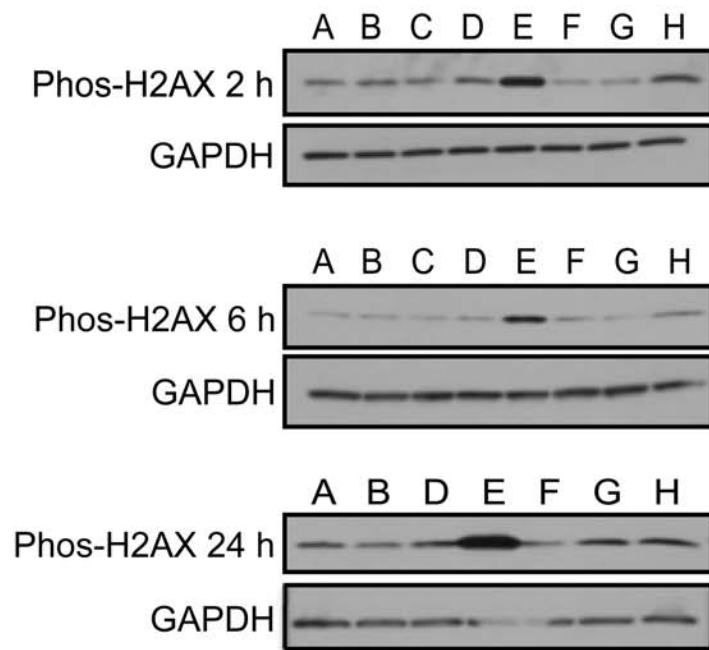

Supplemental Figure 2

Supplement: 108.147330_2.pdf [file 108.147330_2.pdf]
